# Supplementary material for: High methionine intake alters gut microbiota and lipid profile and leads to liver steatosis in mice
Source: Royal Society of Chemistry journal article supplement (doi:10.1039/d4fo01613k), 2024-01-01
Supplement: d4fo01613k1.pdf [file d4fo01613k1.pdf]

Table S1 Composition of animal diets

|                                                      | NRC95 purified diet | HMD    |
|------------------------------------------------------|---------------------|--------|
| Amino acid premix without methionine and cystine (g) | 163.33              | 163.33 |
| Methionine (g)                                       | 8.2                 | 16.4   |
| Cystine (g)                                          | 3.5                 | 3.5    |
| Corn starch (g)                                      | 417.2               | 409    |
| Maltodextrin (g)                                     | 232                 | 232    |
| Fibre (g)                                            | 50                  | 50     |
| Soybean oil (g)                                      | 70                  | 70     |
| Minerals (g)                                         | 43.2                | 43.2   |
| Vitamins (g)                                         | 12.5                | 12.5   |
| Total (g)                                            | 1000                | 1000   |
